# Supplementary material
Source: Frontiers journal article supplement (https://www.frontiersin.org/articles/264719)
Supplement: Data_Sheet_1.ZIP [file Array analysis for In1085 & In1086.xls]

## Sheet: Sheet1
In1085
	Strain	Pc variant	P2 promoter	PintI1	19bp ORF11 dupl.	IntI1	attI1	Array of gene cassettes	5'CS	CDS of GC	attC	3'CS
	Eco336	None	Absent	OK	No	NONE	801-863	aacA4cr(857-1628)-attC(1563-1634)-blaOXA-1(1629-2632)-attC(2549-2638)-catB3(2633-3347)-attC(3294-3353)-arr-3(3348-3884)-attC(3831-3890)-dfrA27(3885-4394)-3'CS	1-856	aacA4cr(969-1568)	attCaacA4cr(857-862;1563-1628)	4395-5668
	5668 bp			"-10": 747-752		1-720 (partial)				blaOXA-1(1699-2529)	attCOXA-1(1629-1634;2549-2632)	qacED1: 4465-4811
				"-35": 770-775		Remnant of intI1 ORF				catB3(2667-3299)	attCcatB3(2633-2638;3294-3347)	sul1: 4805-5644
						No peptide encoded				arr-3(3384-3836)	attCarr-3/catB3(3348-3353;3831-3884)
										dfrA27(3921-4394)	attCarr-3(3885-3890;deleted)
	3837-3884: catB3 attC (last 48 bp over 54 bp)
	As such, this "hybrid" attC is unlikely to be functional for recombination of gene cassette
	3885-3920: Instead of the usual 5'-UTR of the dfrA27 GC, this fragment matches the 5'-UTR of the arr-3 GC
In1086
	Strain	Pc variant	P2 promoter	PintI1	19bp ORF11 dupl.	IntI1	attI1	Array of gene cassettes	5'CS	CDS of GC	attC	3'CS
	Nsa292	None	Absent	OK	No	NONE	801-863	aacA4cr(857-1626)-attC(1561-1632)-blaOXA-1(1627-2630)-attC(2547-2636)-catB3(2631-3345)-attC(3292-3351)-arr-3(3346-3948)-attC(3841-3354)-dfrA27(3949-4510)-attC(4435-4516)-aadA16(4511-5399)-attC(5347-5405)-3'CS	1-856*	aacA4cr(967-1566)	attCaacA4cr(857-862;1561-1626)	5463-6667
	6667 bp			"-10": 747-752		1-720 (partial)				blaOXA-1(1697-2527)	attCOXA-1(1627-1632;2547-2630)	qacED1: 5463-5810
				"-35": 770-775		Remnant of intI1 ORF				catB3(2665-3297)	attCcatB3(2631-2636;3292-3345)	sul1: 5804-6643
						No peptide encoded				arr-3(3382-3834)	attCarr-3(3346-3351;3841-3948)
										dfrA27(3967-4440)	attCdfrA27(3949-3954;4435-4510)
										aadA16D(4549-5067) truncated	attCqacE/aadA16(4511-4516;5347-5399) mutated
	The first 108 bp of 3'- CS is missing
	5400-5462 is a part of the ISCR1 element which is usually located 24 bp away from sul1
	*with a 44 bp deletion of intI1
